# Supplementary material for: Chiral phosphine-squaramides as enantioselective catalysts for the intramolecular Morita–Baylis–Hillman reaction
Source: Royal Society of Chemistry journal article supplement (doi:10.1039/c0cc03187a), 2010-11-09

## Supporting Information

### Chiral Phosphine-Squaramide as Enantioselective Catalyst for the Intramolecular Morita-Baylis-Hillman Reaction

Hong-Liang Song<sup>a</sup>, Kui Yuan<sup>a</sup> and Xin-Yan Wu<sup>\*ab</sup>

<sup>a</sup>*Key Laboratory for Advanced Materials and Institute of Fine Chemicals, East China University of Science and Technology, Shanghai 200237, P, R, China*

<sup>b</sup>*State Key Laboratory of Elemento-organic Chemistry, Nankai University, Tianjin 300071, P, R, China*

E-mail: [xinyanwu@ecust.edu.cn](mailto:xinyanwu@ecust.edu.cn); Tel: 86 21 64252011; Fax: 86 21 64252758

|                                                                                             |     |
|---------------------------------------------------------------------------------------------|-----|
| 1. General Information                                                                      | S2  |
| 2. Synthesis of Chiral Phosphine-Squaramide Catalysts                                       | S2  |
| 3. General Procedure for Enantioselective MBH Reaction                                      | S3  |
| 4. References                                                                               | S4  |
| 5. HPLC Spectra for the MBH Products                                                        | S5  |
| 6. <sup>1</sup> H NMR, <sup>13</sup> C NMR and <sup>31</sup> P NMR Spectra of the Catalysts | S19 |

## 1. General Information

Melting points were taken without correction. Optical rotations were measured on a WZZ-2A digital polarimeter at the wavelength of the sodium D-line (589 nm).  $^1\text{H}$  NMR spectra were referenced to tetramethylsilane (d, 0.00 ppm) using  $\text{CDCl}_3$  as solvent.  $^{13}\text{C}$  NMR spectra were referenced to solvent carbons (77.0 ppm for  $\text{CDCl}_3$ ).  $^{31}\text{P}$  NMR spectra were referenced to an external  $\text{H}_3\text{PO}_4$  signal (0.0 ppm). IR spectra were recorded on Nicolet Magna-I 550 spectrometer. High Resolution Mass spectra (HRMS) were recorded on Micromass GCT with Electron Ionization (EI) resource. HPLC analysis was performed on Waters 510 with 2487 detector using Daicel Chiralcel OD-H, Chiralpak AS-H or Chiralpak AD-H column.

Toluene, *n*-hexane and ether were freshly distilled from sodium-benzophenone. Dichloromethane, chloroform, acetonitrile were freshly distilled from  $\text{CaH}_2$ . Methanol, ethanol and isopropanol were distilled from magnesium. Thin-layer chromatography (TLC) was performed on 10-40  $\mu\text{m}$  silica gel plates. Column chromatography was performed using silica gel (300-400 mesh) eluting with ethyl acetate, petroleum ether and  $\text{CH}_2\text{Cl}_2$ .

## 2. Synthesis of Chiral Phosphine-Squaramide Catalysts

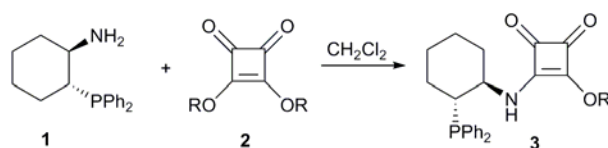

General procedure: To a solution of the squarate **2**<sup>1</sup> (0.59 mmol, 1.2 eq.) in  $\text{CH}_2\text{Cl}_2$  (4 mL) was added dropwise a solution of (*R,R*)-2-amino-1-(diphenylphosphino)-cyclohexane (**1**)<sup>2</sup> (140 mg, 0.49 mmol) in  $\text{CH}_2\text{Cl}_2$  (4 mL). The reaction mixture was stirring at room temperature or under reflux (monitoring by TLC), then the resulting solution was concentrated and purified by silica gel column chromatography to give the phosphine-squaramide **3**.

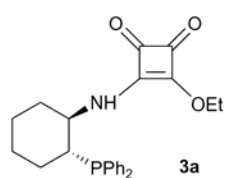

White solid, 89% yield. M.p.: 69.4-71.5 °C.  $[\alpha]_{\text{D}}^{28} = +20.5$  (*c* 2.0,  $\text{CH}_2\text{Cl}_2$ ).  $^1\text{H}$  NMR ( $\text{DMSO}-d_6$ , 400 MHz, rt):  $\delta$  8.85 (d, *J* = 8.3 Hz, 0.5H), 8.46 (d, *J* = 8.3 Hz, 0.5H), 7.46-7.33 (m, 10H), 4.68-4.63 (m, 1H), 4.51-4.46 (m, 1H), 3.86-3.83 (m, 0.5H), 3.35 (m, 0.5H, part in water peak), 2.56-2.50 (m, 1H, part in  $\text{DMSO}-d_6$  residual peak), 1.86 (s, 1H), 1.68-1.48 (m, 4H), 1.39-1.28 (m, 3H), 1.23-1.11 (m, 2H), 0.83 (s, 1H);  $^{13}\text{C}$  NMR ( $\text{CDCl}_3$ , 100 MHz):  $\delta$  189.6, 181.9, 176.7, 170.8, 136.3 (d, *J* = 12.8 Hz), 134.9 (d, *J* = 15.8 Hz), 134.5 (d, *J* = 21.2 Hz), 132.6 (d, *J* = 18.4 Hz), 129.0, 128.3-128.1 (m), 69.4, 56.8 (d, *J* = 15.7 Hz), 40.4 (d, *J* = 15.7 Hz), 34.8 (d, *J* = 6.9 Hz), 27.6 (d, *J* = 3.8 Hz), 25.1 (d, *J* = 4.2 Hz), 24.5, 15.8;  $^{31}\text{P}$  NMR ( $\text{CDCl}_3$ , 202 MHz):  $\delta$  -6.50; IR (KBr,  $\text{cm}^{-1}$ ):  $\nu$  3251, 3050, 2931, 2855, 1802, 1704, 1604, 1520, 1494, 1479, 1434, 1384, 1344, 1117, 1091, 1024, 999, 869, 883,

742, 699, 508; HRMS Calcd for C<sub>24</sub>H<sub>26</sub>NO<sub>3</sub>P ([M]<sup>+</sup>): 407.1650, Found: 407.1669.

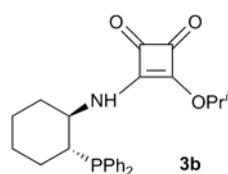

White solid, 69% yield. M.p.: 74.4-76.6 °C.  $[\alpha]_D^{30} = +25.7$  (*c* 1.5, CH<sub>2</sub>Cl<sub>2</sub>). <sup>1</sup>H NMR (DMSO-*d*<sub>6</sub>, 400 MHz, rt): δ 8.89 (d, *J* = 9.0 Hz, 0.5H), 8.46 (d, *J* = 9.1 Hz, 0.5H), 7.48-7.31 (m, 10H), δ 5.25 (heptet, *J* = 6.2 Hz, 0.5H), δ 5.08 (heptet, *J* = 6.2 Hz, 0.5H), 3.92-3.82 (m, 0.5H), 3.43-3.33 (m, 0.5H, part in water peak), 2.58-2.50 (m, 1H, part in DMSO-*d*<sub>6</sub> residual peak), 1.89-1.86 (m, 1H), 1.70-1.45 (m, 4H), 1.38 (dd, *J* = 11.8 Hz, 6.2 Hz, 3H), 1.31 (q, *J* = 3.2 Hz, 3H), 1.24-1.06 (m, 2H), 0.86-0.78 (m, 1H); <sup>13</sup>C NMR (CDCl<sub>3</sub>, 100 MHz): δ 189.7, 181.7, 176.6, 171.1, 136.3 (d, *J* = 13.0 Hz), 135.1 (d, *J* = 16.1 Hz), 134.4 (d, *J* = 20.8 Hz), 132.5 (d, *J* = 18.4 Hz), 129.0, 128.4-128.1 (m), 60.3, 56.7 (d, *J* = 16.4 Hz), 40.2 (d, *J* = 16.1 Hz), 35.0 (d, *J* = 7.0 Hz), 27.7 (d, *J* = 3.4 Hz), 25.2 (d, *J* = 4.3 Hz), 22.9-22.8 (m), 20.9, 14.1; <sup>31</sup>P NMR (CDCl<sub>3</sub>, 162 MHz): δ -6.77 (major), -7.39 (minor); IR (KBr, cm<sup>-1</sup>): ν 3251, 3051, 2980, 2932, 2855, 1801, 1703, 1601, 1520, 1480, 1434, 1412, 1387, 1332, 1094, 908, 808, 742, 698, 509; HRMS Calcd for C<sub>25</sub>H<sub>28</sub>NO<sub>3</sub>P ([M]<sup>+</sup>): 421.1807, Found: 421.1815.

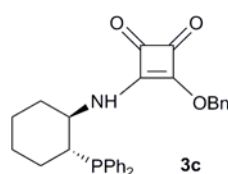

White solid, 39% yield.  $[\alpha]_D^{17} = +21.0$  (*c* 0.69, CH<sub>2</sub>Cl<sub>2</sub>). <sup>1</sup>H NMR (DMSO-*d*<sub>6</sub>, 400 MHz, rt): δ 8.90 (d, *J* = 8.9 Hz, 0.5H), 8.54 (d, *J* = 9.1 Hz, 0.5H), 7.53-7.27 (m, 15H), 5.71 (s, 1H), 5.52 (s, 1H), 3.90-3.80 (m, 0.5H), 3.41-3.32 (m, 0.5H, part in water peak), 2.55-2.50 (m, 1H, part in DMSO-*d*<sub>6</sub> residual peak), 1.88-1.82 (m, 1H), 1.68-1.44 (m, 4H), 1.23-1.03 (m, 2H), 0.89-0.74 (m, 1H); <sup>1</sup>H NMR (DMSO-*d*<sub>6</sub>, 400 MHz, 333K): δ 8.71 (s, 0.5H), 8.38 (s, 0.5H), 7.45-7.27 (m, 15H), 5.71 (s, 1H), 5.53 (s, 1H), 3.88 (s, 0.5H), 3.41 (s, 0.5H), 2.57-2.50 (m, 1H, part in DMSO-*d*<sub>6</sub> residual peak), 1.86 (s, 1H), 1.70-1.48 (m, 4H), 1.25-1.07 (m, 2H), 0.88 (s, 1H); <sup>13</sup>C NMR (CDCl<sub>3</sub>, 100 MHz): δ 189.6, 182.3, 176.4, 171.0, 136.5 (d, *J* = 12.8 Hz), 135.2 (d, *J* = 16.2 Hz), 134.5 (d, *J* = 21.0 Hz), 132.9 (d, *J* = 19.1 Hz), 129.1 (d, *J* = 4.4 Hz), 128.9, 128.8, 128.6 (d, *J* = 3.1 Hz), 128.5 (d, *J* = 6.5 Hz), 128.3 (d, *J* = 7.6 Hz), 74.5, 57.3 (d, *J* = 16.6 Hz), 40.6 (d, *J* = 15.8 Hz), 34.9 (d, *J* = 6.8 Hz), 28.0 (d, *J* = 5.4 Hz), 25.3 (d, *J* = 4.9 Hz), 24.7; <sup>31</sup>P NMR (CDCl<sub>3</sub>, 162 MHz): δ -6.78 (major), -7.53 (minor); HRMS (ESI) Calcd for C<sub>29</sub>H<sub>28</sub>NO<sub>3</sub>PNa ([M+Na]<sup>+</sup>): 492.1704, Found: 492.1708.

### 3. General Procedure for the Enantioselective Intramolecular MBH Reaction

Phosphine-Squaramide **3a** (2.4 mg, 0.006 mmol) and EtOH (1.0 mL) were added to a vessel containing substrate **4** (0.20 mmol) and stirred at 25°C. After the reaction was completed (monitoring by TLC), the solvent was removed under reduced pressure and the residue was

purified by column chromatography on silica gel to afford the intramolecular MBH adduct **5** and the ee values were determined by HPLC analysis using chiral column.<sup>3</sup>

#### 4. References

- 1 N. Fu, A. D. Allen, S. Kobayashi, T. T. Tidwell and S. Vukovic, *J. Org. Chem.* 2008, **73**, 1768-1773.
- 2 (a) A. Caiazzo, S. Dalili and A. K. Yudin, *Org. Lett.*, 2002, **4**, 2597-2600; (b) Y.-Q. Fang and E. N. Jacobsen, *J. Am. Chem. Soc.*, 2008, **130**, 5660-5661; (c) K. Yuan, L. Zhang, H.-L. Song, Y. Hu and X.-Y. Wu, *Tetrahedron Lett.*, 2008, **49**, 6262-6264.
- 3 The analytical data of the intramolecular MBH products **4** could be found in our recent publication: J.-J. Gong, K. Yuan, H.-L. Song, and X.-Y. Wu, *Tetrahedron*, 2010, **66**, 2439-2443.

## 5. HPLC Spectra for the MBH Products

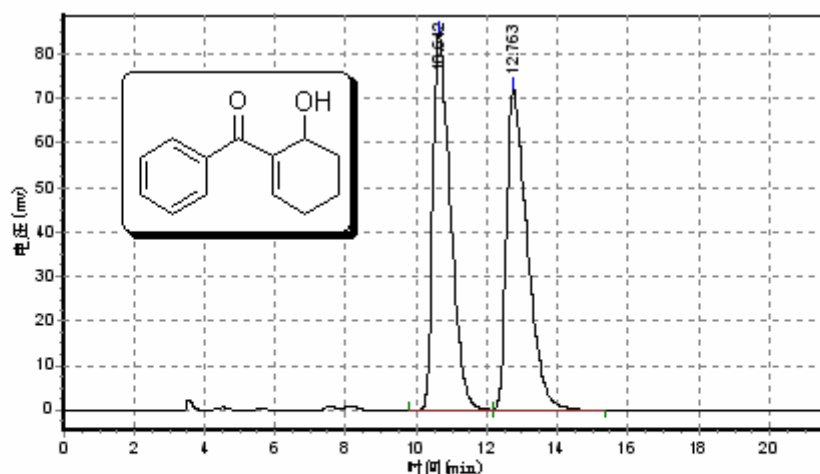

分析结果表

| 峰号 | 峰名 | 保留时间   | 峰高         | 峰面积         | 含量       |
|----|----|--------|------------|-------------|----------|
| 1  |    | 10.642 | 84548.453  | 2934675.500 | 49.9637  |
| 2  |    | 12.763 | 71940.625  | 2938942.500 | 50.0363  |
| 总计 |    |        | 156489.078 | 5873618.000 | 100.0000 |

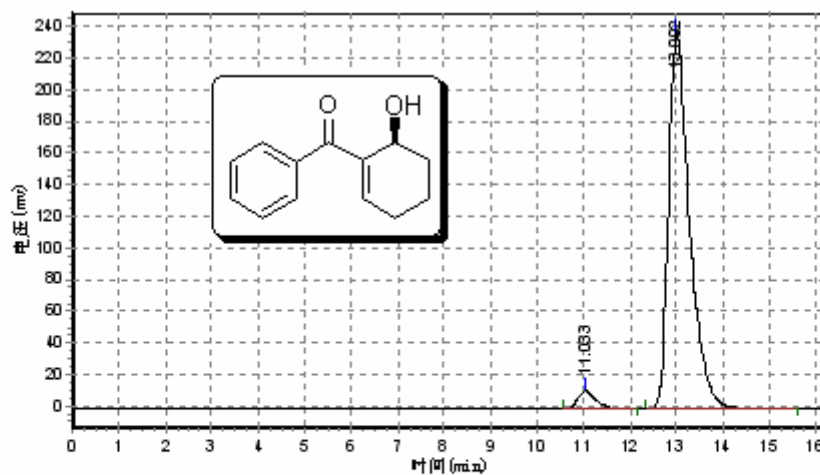

分析结果表

| 峰号 | 峰名 | 保留时间   | 峰高         | 峰面积         | 含量       |
|----|----|--------|------------|-------------|----------|
| 1  |    | 11.033 | 10688.000  | 279528.719  | 3.6141   |
| 2  |    | 13.002 | 238311.953 | 7454806.000 | 96.3859  |
| 总计 |    |        | 248999.953 | 7734334.719 | 100.0000 |

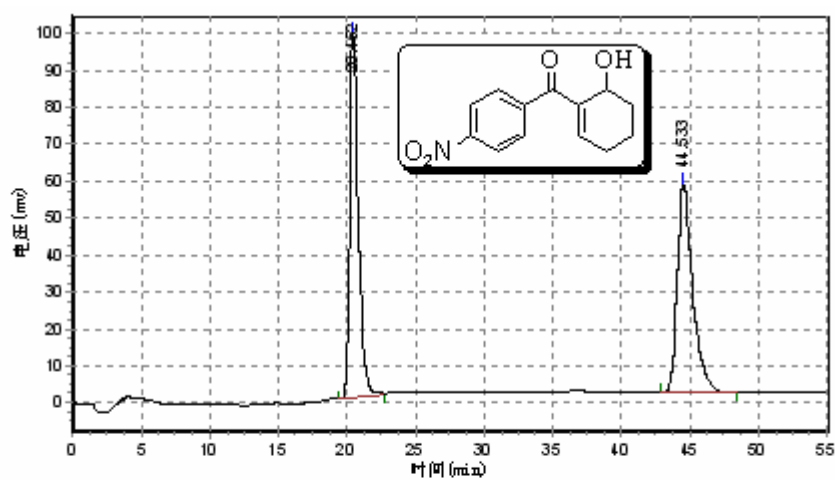

分析结果表

| 峰号 | 峰名 | 保留时间   | 峰高         | 峰面积         | 含量       |
|----|----|--------|------------|-------------|----------|
| 1  |    | 20.452 | 98324.961  | 4341880.000 | 49.6548  |
| 2  |    | 44.533 | 56373.234  | 4402254.500 | 50.3452  |
| 总计 |    |        | 154698.195 | 8744134.500 | 100.0000 |

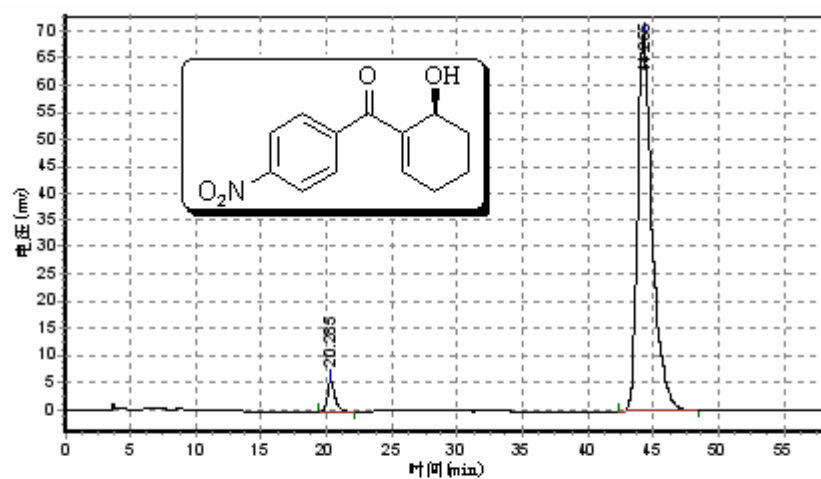

分析结果表

| 峰号 | 峰名 | 保留时间   | 峰高        | 峰面积         | 含量       |
|----|----|--------|-----------|-------------|----------|
| 1  |    | 20.285 | 5455.848  | 226086.750  | 3.9970   |
| 2  |    | 44.255 | 69682.680 | 5430376.000 | 96.0030  |
| 总计 |    |        | 75138.528 | 5656462.750 | 100.0000 |

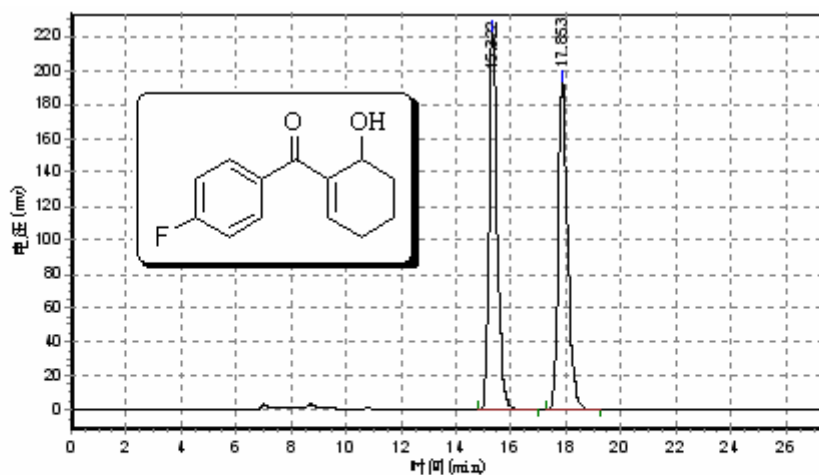

分析结果表

| 峰号 | 峰名 | 保留时间   | 峰高         | 峰面积         | 含量       |
|----|----|--------|------------|-------------|----------|
| 1  |    | 15.322 | 221951.484 | 4632682.000 | 50.0403  |
| 2  |    | 17.853 | 191978.016 | 4625211.500 | 49.9597  |
| 总计 |    |        | 413929.500 | 9257893.500 | 100.0000 |

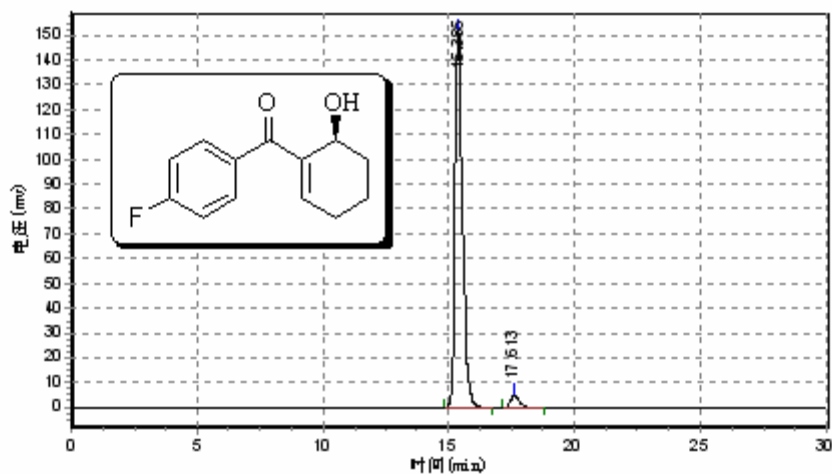

分析结果表

| 峰号 | 峰名 | 保留时间   | 峰高         | 峰面积         | 含量       |
|----|----|--------|------------|-------------|----------|
| 1  |    | 15.385 | 151661.766 | 3187319.750 | 96.4632  |
| 2  |    | 17.613 | 4920.406   | 116863.703  | 3.5368   |
| 总计 |    |        | 156582.171 | 3304183.453 | 100.0000 |

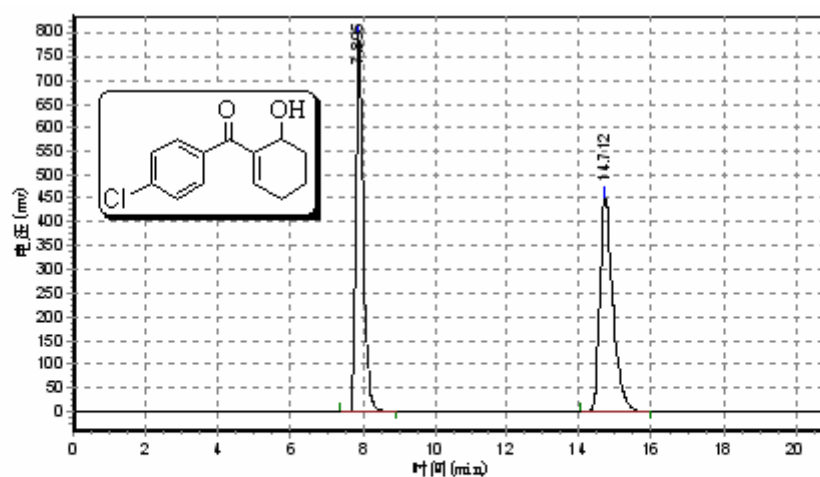

分析结果表

| 峰号 | 峰名 | 保留时间   | 峰高          | 峰面积          | 含量       |
|----|----|--------|-------------|--------------|----------|
| 1  |    | 7.895  | 795895.938  | 11324862.000 | 49.9533  |
| 2  |    | 14.712 | 450383.125  | 11346019.000 | 50.0467  |
| 总计 |    |        | 1246279.063 | 22670881.000 | 100.0000 |

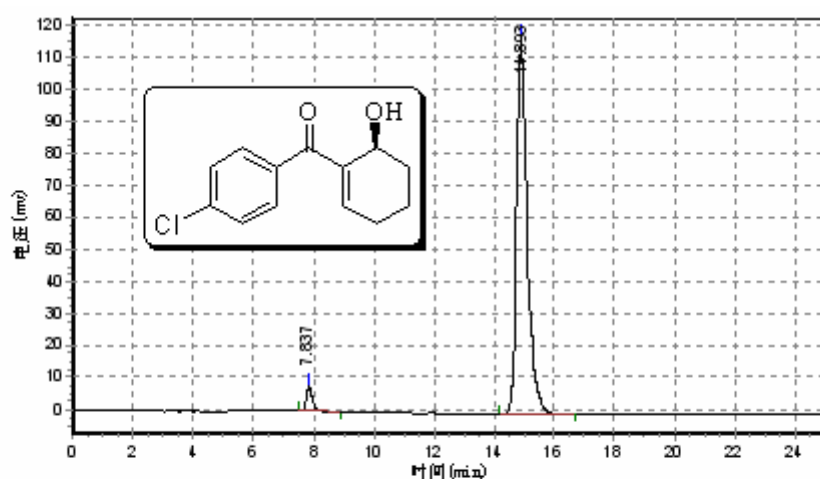

分析结果表

| 峰号 | 峰名 | 保留时间   | 峰高         | 峰面积         | 含量       |
|----|----|--------|------------|-------------|----------|
| 1  |    | 7.837  | 7873.555   | 102177.742  | 3.4670   |
| 2  |    | 14.893 | 117478.563 | 2844986.250 | 96.5330  |
| 总计 |    |        | 125352.118 | 2947163.992 | 100.0000 |

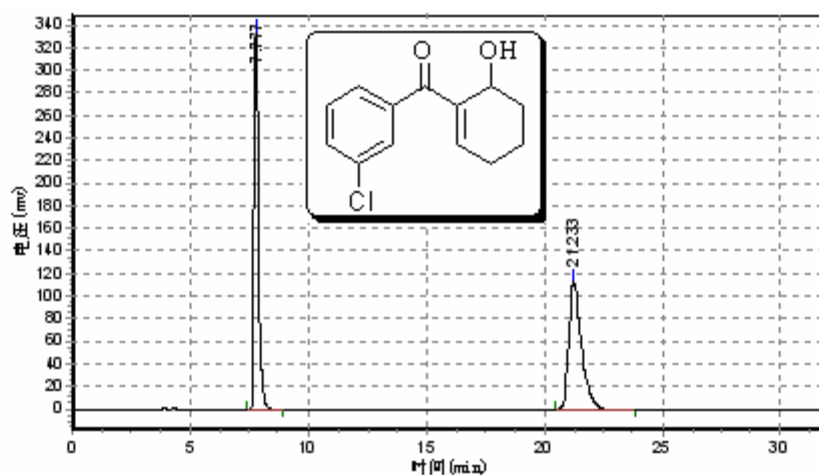

分析结果表

| 峰号 | 峰名 | 保留时间   | 峰高         | 峰面积         | 含量       |
|----|----|--------|------------|-------------|----------|
| 1  |    | 7.777  | 332568.656 | 4218205.000 | 50.0763  |
| 2  |    | 21.233 | 111346.500 | 4205348.500 | 49.9237  |
| 总计 |    |        | 443915.156 | 8423553.500 | 100.0000 |

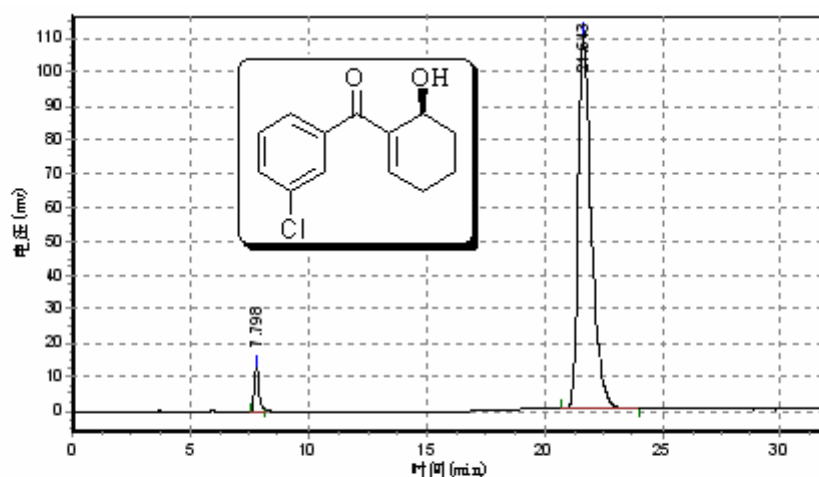

分析结果表

| 峰号 | 峰名 | 保留时间   | 峰高         | 峰面积         | 含量       |
|----|----|--------|------------|-------------|----------|
| 1  |    | 7.798  | 12905.007  | 166948.219  | 3.7572   |
| 2  |    | 21.643 | 110464.789 | 4276447.000 | 96.2428  |
| 总计 |    |        | 123369.796 | 4443395.219 | 100.0000 |

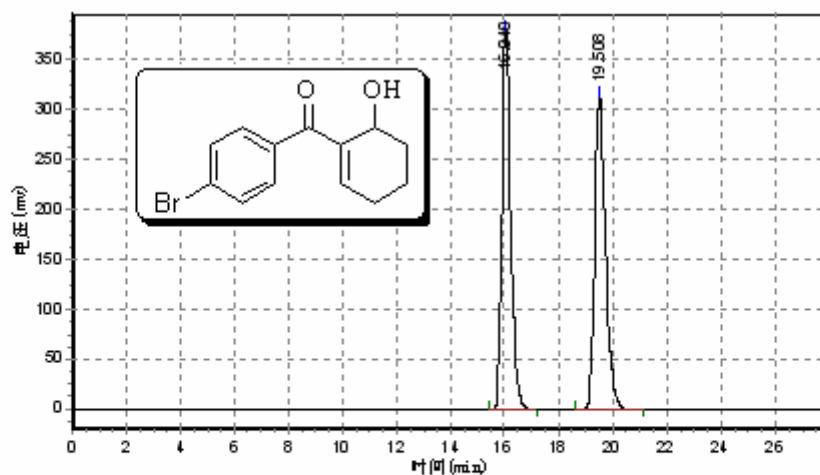

分析结果表

| 峰号 | 峰名 | 保留时间   | 峰高         | 峰面积          | 含量       |
|----|----|--------|------------|--------------|----------|
| 1  |    | 16.040 | 376694.594 | 8647735.000  | 49.8362  |
| 2  |    | 19.508 | 311377.125 | 8704573.000  | 50.1638  |
| 总计 |    |        | 688071.719 | 17352308.000 | 100.0000 |

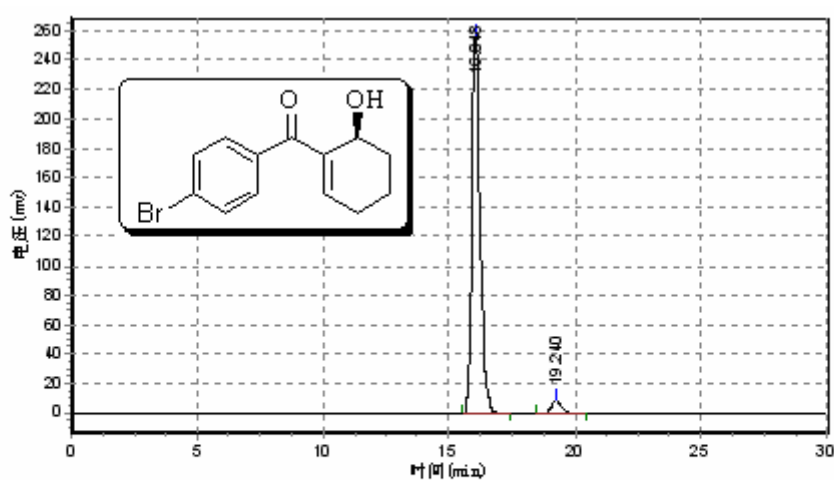

分析结果表

| 峰号 | 峰名 | 保留时间   | 峰高         | 峰面积         | 含量       |
|----|----|--------|------------|-------------|----------|
| 1  |    | 16.048 | 256509.469 | 5899752.000 | 95.9891  |
| 2  |    | 19.240 | 8917.200   | 246522.203  | 4.0109   |
| 总计 |    |        | 265426.669 | 6146274.203 | 100.0000 |

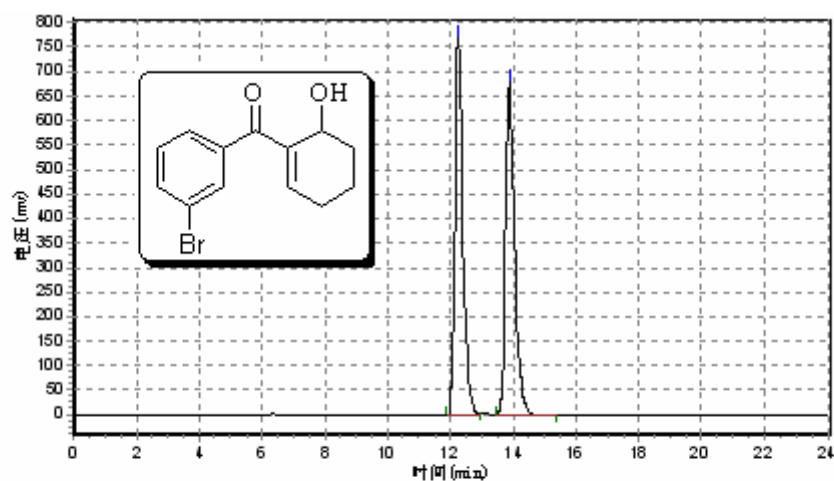

分析结果表

| 峰号 | 峰名 | 保留时间   | 峰高          | 峰面积          | 含量       |
|----|----|--------|-------------|--------------|----------|
| 1  |    | 12.245 | 768069.188  | 13626761.000 | 49.9474  |
| 2  |    | 13.880 | 681994.438  | 13655438.000 | 50.0526  |
| 总计 |    |        | 1450063.625 | 27282199.000 | 100.0000 |

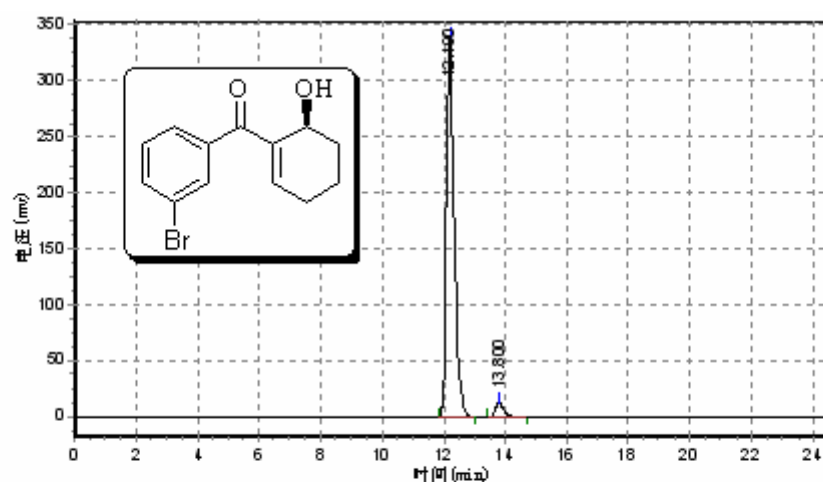

分析结果表

| 峰号 | 峰名 | 保留时间   | 峰高         | 峰面积         | 含量       |
|----|----|--------|------------|-------------|----------|
| 1  |    | 12.190 | 336583.938 | 5933501.000 | 96.1554  |
| 2  |    | 13.800 | 11902.874  | 237239.766  | 3.8446   |
| 总计 |    |        | 348486.812 | 6170740.766 | 100.0000 |

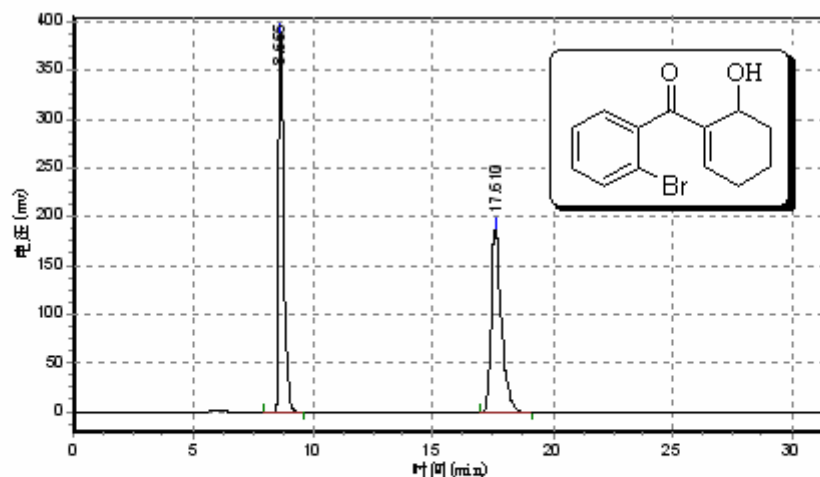

分析结果表

| 峰号 | 峰名 | 保留时间   | 峰高         | 峰面积          | 含量       |
|----|----|--------|------------|--------------|----------|
| 1  |    | 8.655  | 385038.344 | 5570692.000  | 49.9753  |
| 2  |    | 17.610 | 186561.781 | 5576208.000  | 50.0247  |
| 总计 |    |        | 571600.125 | 11146900.000 | 100.0000 |

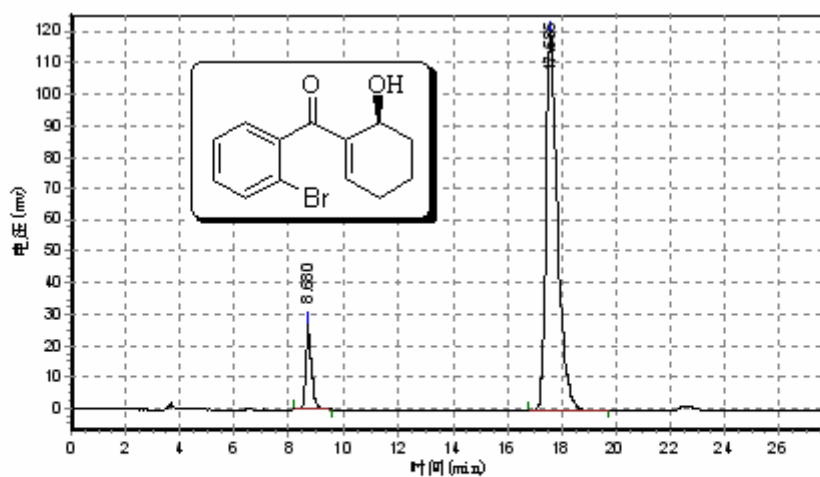

分析结果表

| 峰号 | 峰名 | 保留时间   | 峰高         | 峰面积         | 含量       |
|----|----|--------|------------|-------------|----------|
| 1  |    | 8.680  | 27040.830  | 391106.688  | 9.9290   |
| 2  |    | 17.585 | 119912.258 | 3547917.250 | 90.0710  |
| 总计 |    |        | 146953.088 | 3939023.938 | 100.0000 |

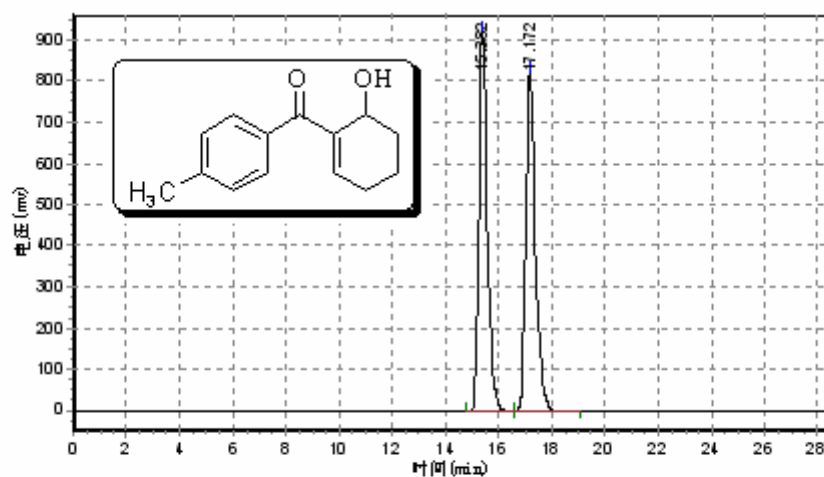

分析结果表

| 峰号 | 峰名 | 保留时间   | 峰高          | 峰面积          | 含量       |
|----|----|--------|-------------|--------------|----------|
| 1  |    | 15.382 | 916672.313  | 20368818.000 | 49.9483  |
| 2  |    | 17.172 | 817900.563  | 20410990.000 | 50.0517  |
| 总计 |    |        | 1734572.875 | 40779808.000 | 100.0000 |

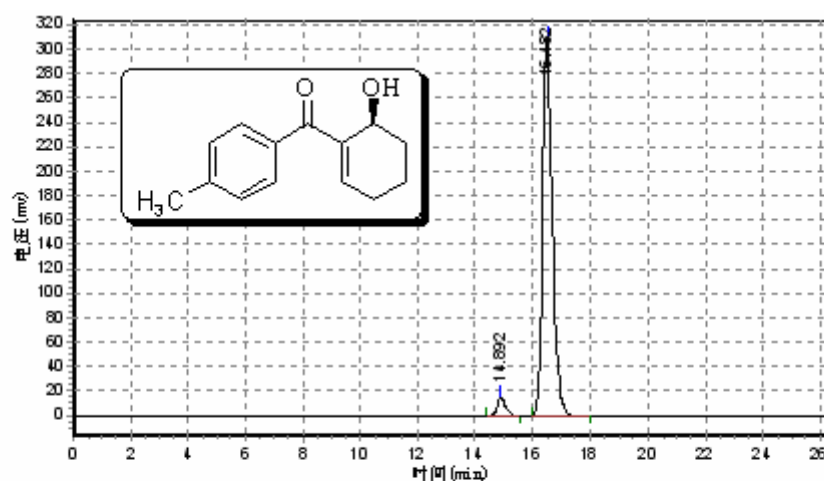

分析结果表

| 峰号 | 峰名 | 保留时间   | 峰高         | 峰面积         | 含量       |
|----|----|--------|------------|-------------|----------|
| 1  |    | 14.892 | 14475.043  | 308946.156  | 4.0699   |
| 2  |    | 16.482 | 309095.875 | 7282146.500 | 95.9302  |
| 总计 |    |        | 323570.918 | 7591092.656 | 100.0000 |

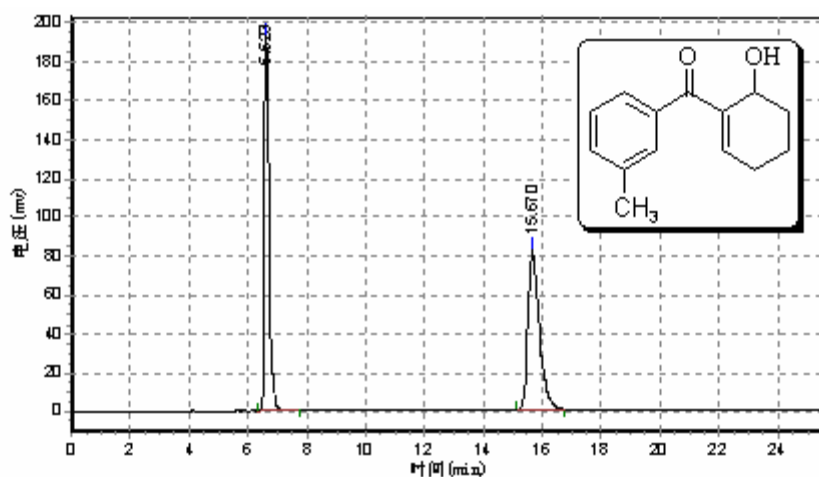

分析结果表

| 峰号 | 峰名 | 保留时间   | 峰高         | 峰面积         | 含量       |
|----|----|--------|------------|-------------|----------|
| 1  |    | 6.623  | 192924.578 | 2111698.000 | 49.9086  |
| 2  |    | 15.670 | 82058.695  | 2119429.250 | 50.0914  |
| 总计 |    |        | 274983.273 | 4231127.250 | 100.0000 |

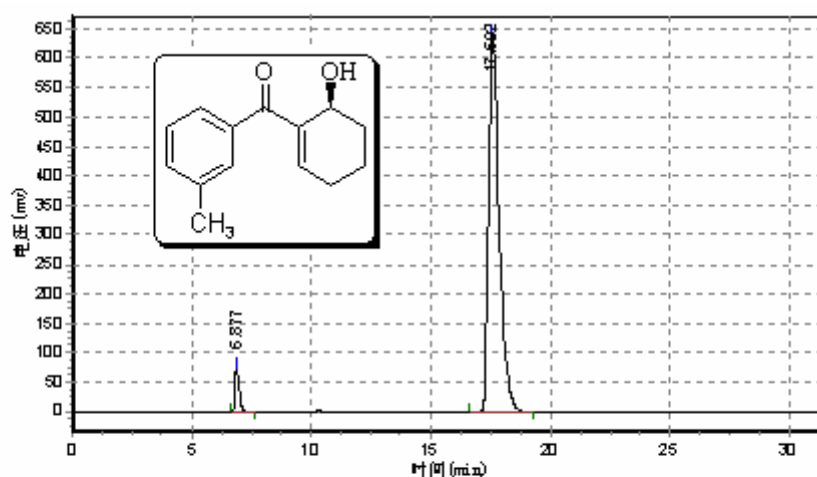

分析结果表

| 峰号 | 峰名 | 保留时间   | 峰高         | 峰面积          | 含量       |
|----|----|--------|------------|--------------|----------|
| 1  |    | 6.877  | 72249.586  | 866866.313   | 4.1760   |
| 2  |    | 17.592 | 640215.625 | 19891390.000 | 95.8240  |
| 总计 |    |        | 712465.211 | 20758256.313 | 100.0000 |

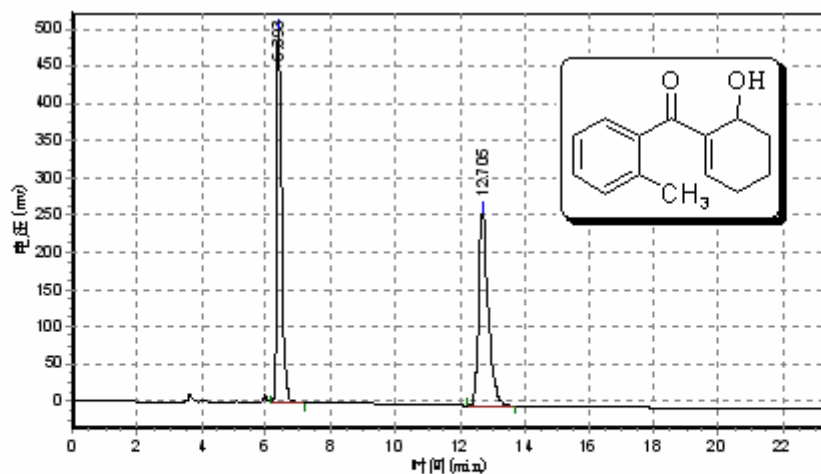

分析结果表

| 峰号 | 峰名 | 保留时间   | 峰高         | 峰面积          | 含量       |
|----|----|--------|------------|--------------|----------|
| 1  |    | 6.393  | 498386.250 | 5317947.500  | 49.9226  |
| 2  |    | 12.705 | 258437.641 | 5334432.500  | 50.0774  |
| 总计 |    |        | 756823.891 | 10652380.000 | 100.0000 |

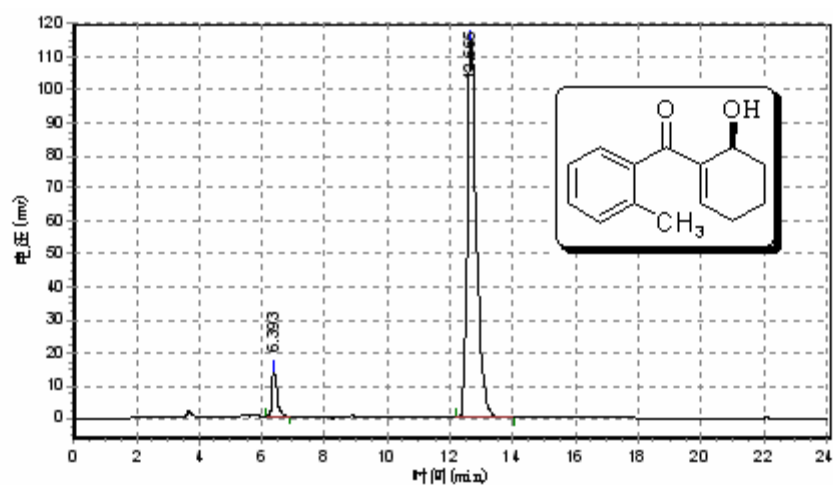

分析结果表

| 峰号 | 峰名 | 保留时间   | 峰高         | 峰面积         | 含量       |
|----|----|--------|------------|-------------|----------|
| 1  |    | 6.393  | 13302.870  | 146191.500  | 5.8478   |
| 2  |    | 12.665 | 113932.766 | 2353752.750 | 94.1522  |
| 总计 |    |        | 127235.636 | 2499944.250 | 100.0000 |

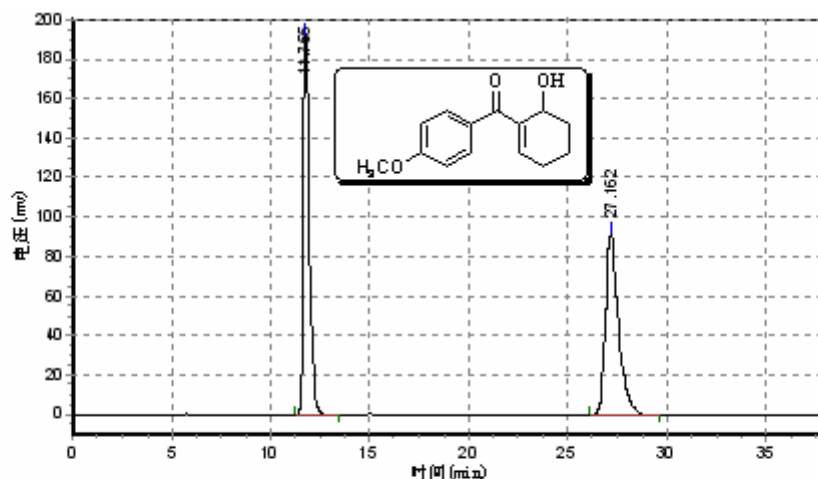

分析结果表

| 峰号 | 峰名 | 保留时间   | 峰高         | 峰面积         | 含量       |
|----|----|--------|------------|-------------|----------|
| 1  |    | 11.755 | 190892.094 | 4169246.750 | 49.9537  |
| 2  |    | 27.162 | 91167.531  | 4176967.250 | 50.0463  |
| 总计 |    |        | 282059.625 | 8346214.000 | 100.0000 |

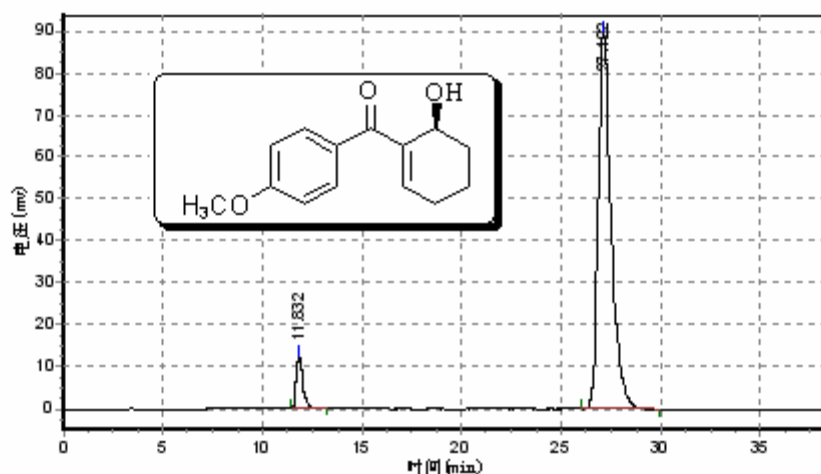

分析结果表

| 峰号 | 峰名 | 保留时间   | 峰高         | 峰面积         | 含量       |
|----|----|--------|------------|-------------|----------|
| 1  |    | 11.832 | 12028.707  | 254763.406  | 5.9292   |
| 2  |    | 27.122 | 89329.836  | 4041964.000 | 94.0708  |
| 总计 |    |        | 101358.543 | 4296727.406 | 100.0000 |

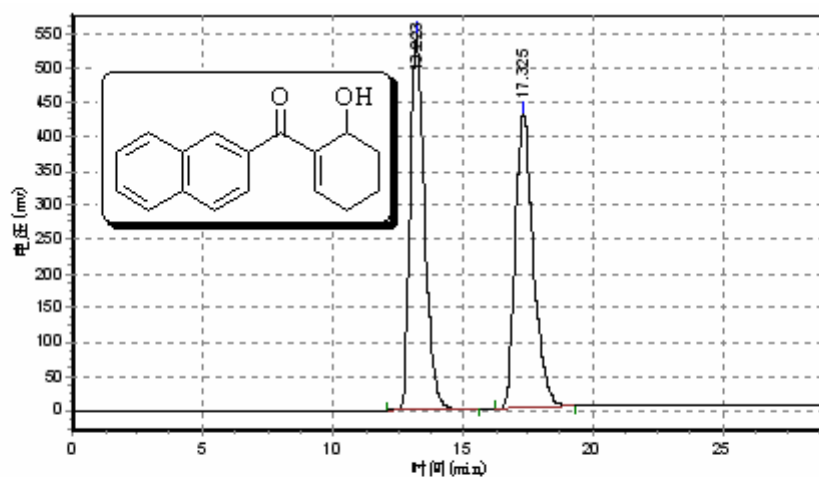

分析结果表

| 峰号 | 峰名 | 保留时间   | 峰高         | 峰面积          | 含量       |
|----|----|--------|------------|--------------|----------|
| 1  |    | 13.223 | 549064.438 | 20679280.000 | 49.9560  |
| 2  |    | 17.325 | 428966.844 | 20715708.000 | 50.0440  |
| 总计 |    |        | 978031.281 | 41394988.000 | 100.0000 |

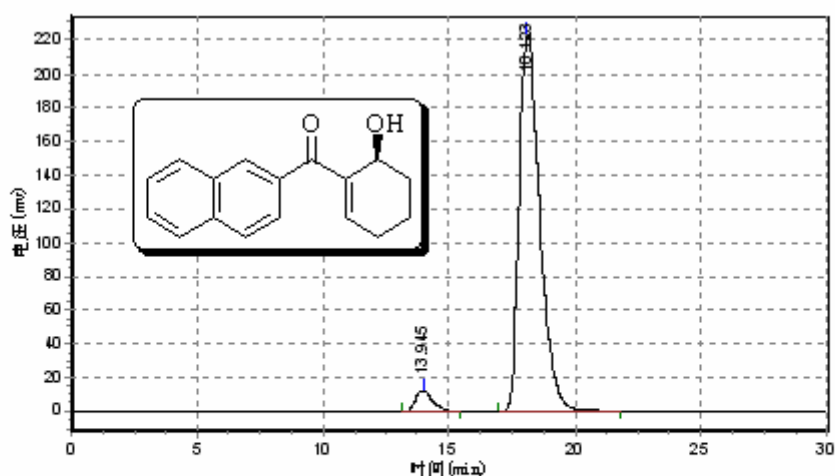

分析结果表

| 峰号 | 峰名 | 保留时间   | 峰高         | 峰面积          | 含量       |
|----|----|--------|------------|--------------|----------|
| 1  |    | 13.945 | 12074.282  | 528100.813   | 4.0608   |
| 2  |    | 18.123 | 222864.344 | 12476867.000 | 95.9392  |
| 总计 |    |        | 234938.626 | 13004967.813 | 100.0000 |

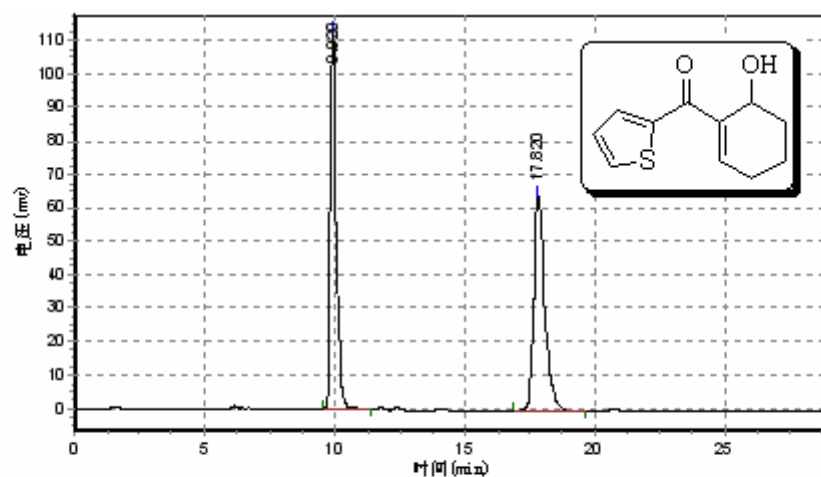

分析结果表

| 峰号 | 峰名 | 保留时间   | 峰高         | 峰面积         | 含量       |
|----|----|--------|------------|-------------|----------|
| 1  |    | 9.920  | 112334.445 | 1805897.375 | 49.9957  |
| 2  |    | 17.820 | 63703.195  | 1806209.750 | 50.0043  |
| 总计 |    |        | 176037.641 | 3612107.125 | 100.0000 |

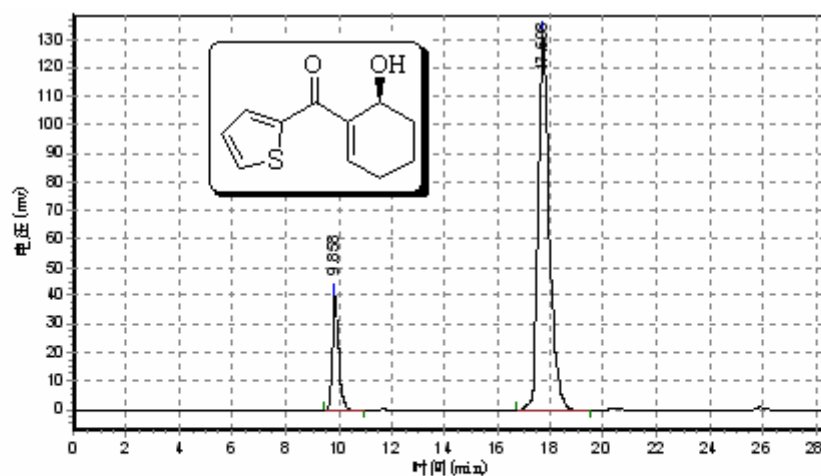

分析结果表

| 峰号 | 峰名 | 保留时间   | 峰高         | 峰面积         | 含量       |
|----|----|--------|------------|-------------|----------|
| 1  |    | 9.858  | 40421.715  | 676629.313  | 15.0986  |
| 2  |    | 17.698 | 132321.547 | 3804775.500 | 84.9014  |
| 总计 |    |        | 172743.262 | 4481404.813 | 100.0000 |

## 6. $^1\text{H}$ NMR, $^{13}\text{C}$ NMR and $^{31}\text{P}$ NMR Spectra of Catalyst 3a-c

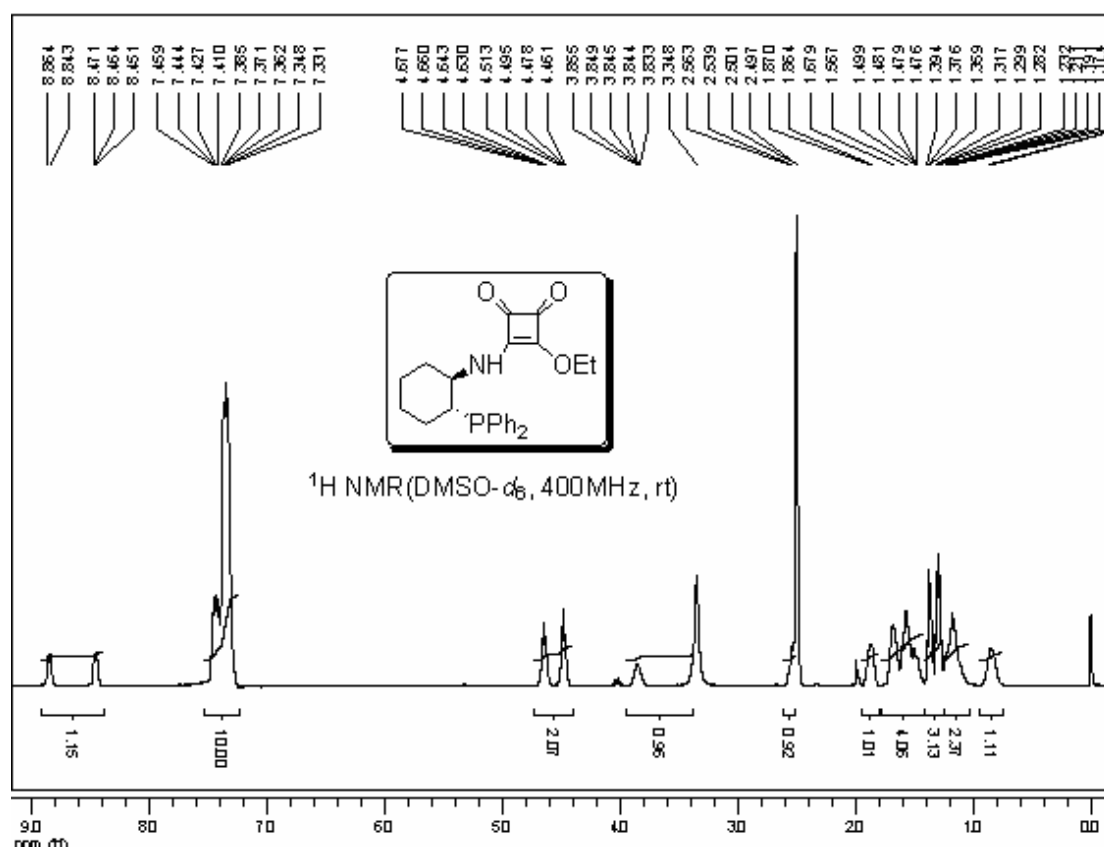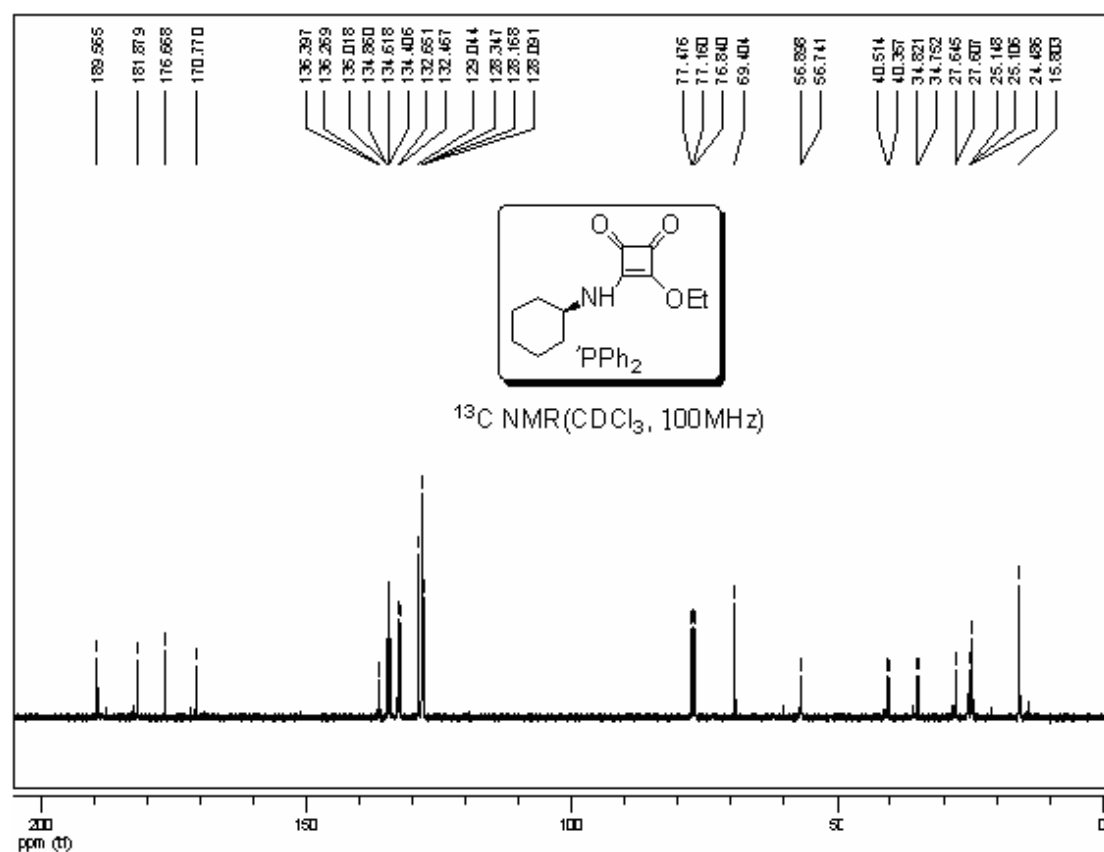

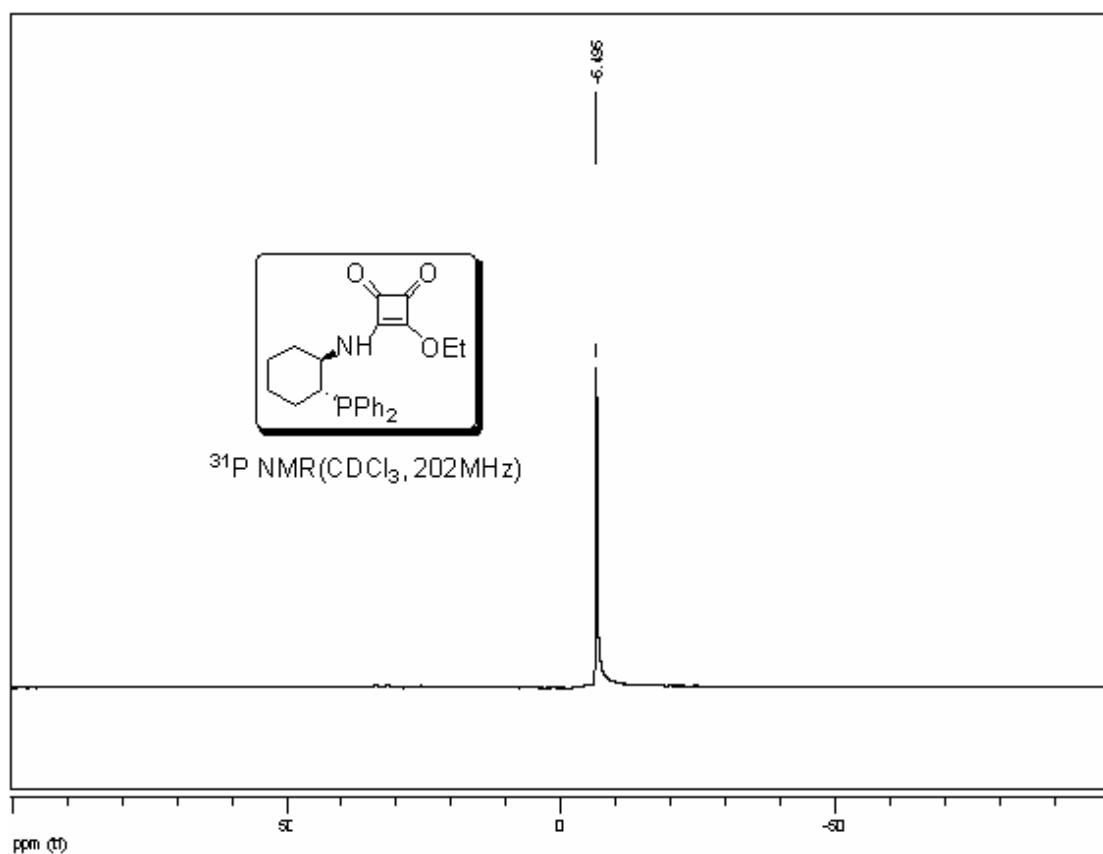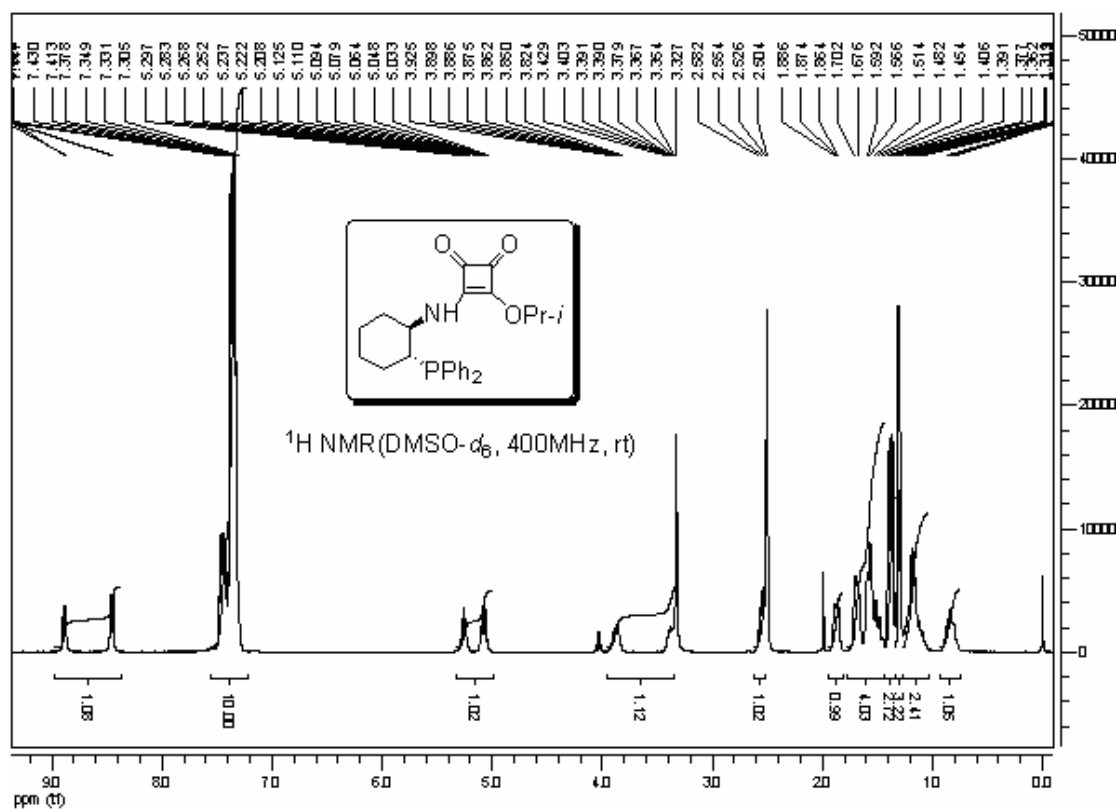

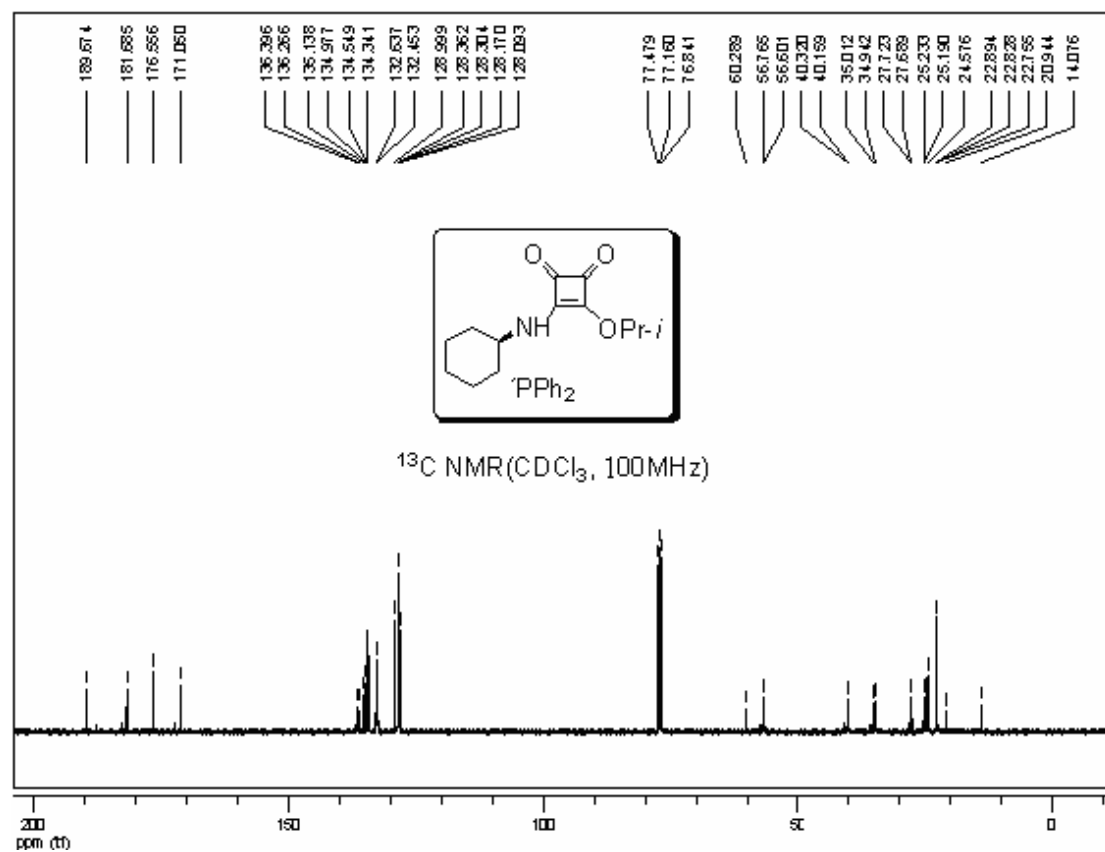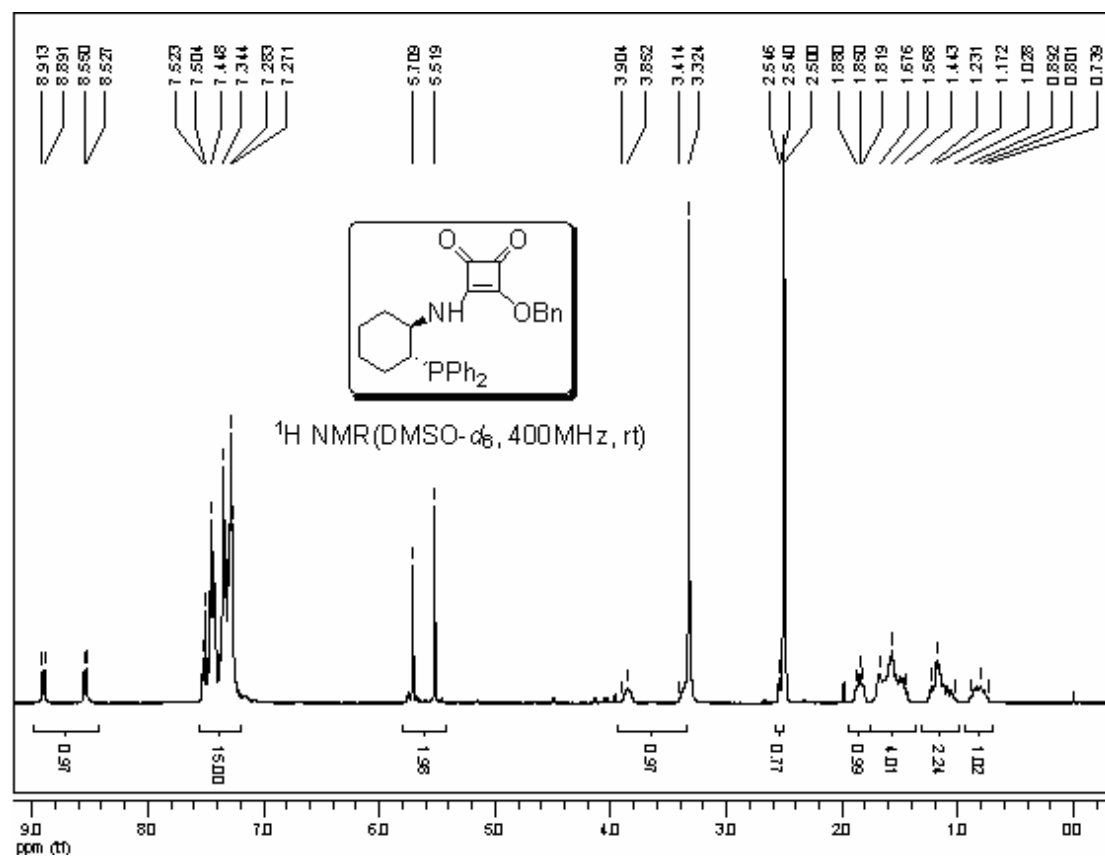

Supplement: c0cc03187a.pdf [file c0cc03187a.pdf]
